# Supplementary material
Source: HighWire-hosted journal article supplement (https://www.annfammed.org/highwire/filestream/628/field_highwire_adjunct_files/0/vanWanrooij_Supp_Apps.pdf)
Supplement: vanWanrooij_Supp_Apps.pdf [file vanWanrooij_Supp_Apps.pdf]

## Supplemental materials for

van Wanrooij LL, Richard E, Jongstra S, Moll van Charante EP, van Gool WA. Associations of subjective memory complaints and simple memory task scores with future dementia in the primary care setting. *Ann Fam Med*. 2019;17(5):412-418.

Supplementary table 1. Participants with and without a missing diagnosis of dementia at follow-up

| <b>Demographics</b>               | <b>Dementia status at follow-up available<br/>(N = 3454)</b> | <b>Dementia status at follow-up missing<br/>(N = 72)</b> | <b>p-value</b> |
|-----------------------------------|--------------------------------------------------------------|----------------------------------------------------------|----------------|
| Mean age (years) (SD)             | 74.3 (2.5)                                                   | 74.0 (2.7)                                               | 0.311          |
| Sex male, n (%)                   | 1569 (45%)                                                   | 38 (53%)                                                 | 0.263          |
| Educational level                 |                                                              |                                                          | 0.154          |
| Low (<7 years), n (%)             | 822 (24%)                                                    | 14 (20%)                                                 |                |
| Intermediate (7-12 years), n (%)  | 2140 (63%)                                                   | 42 (59%)                                                 |                |
| High (>12 years), n (%)           | 458 (13%)                                                    | 15 (21%)                                                 |                |
| Subjective memory complaints      | 601 (18%)                                                    | 10 (14%)                                                 | 0.513          |
| MMSE delayed recall, median (IQR) | 2 (2-3)                                                      | 2 (2-3)                                                  | 0.483          |
| VAT at baseline, median (IQR)     | 6 (5-6)                                                      | 6 (6-6)                                                  | 0.682          |

**Supplementary table 2. Risk of dementia for SMC in combination with MMSE-5 and VAT**

|                                                  | n/N          | HR (95% CI)          | p-value | Adjusted HR <sup>c</sup> (95% CI) <sup>*</sup> | p-value |
|--------------------------------------------------|--------------|----------------------|---------|------------------------------------------------|---------|
| No SMC, optimal MMSE-5, optimal VAT <sup>a</sup> | 26/921 (3%)  | 1 (reference)        |         |                                                |         |
| No SMC, optimal MMSE-5, imperfect VAT            | 22/249 (9%)  | 3.45 (1.95 to 6.09)  | <.001   | 3.51 (1.99 to 6.20)                            | <.001   |
| No SMC, imperfect MMSE-5, optimal VAT            | 51/1138 (4%) | 1.66 (1.03 to 2.66)  | 0.036   | 1.58 (0.98 to 2.55)                            | 0.060   |
| No SMC, imperfect MMSE-5, imperfect VAT          | 46/500 (9%)  | 3.61 (2.23 to 5.85)  | <.001   | 3.34 (2.06 to 5.43)                            | <.001   |
|                                                  |              |                      |         |                                                |         |
| SMC, optimal MMSE-5, optimal VAT                 | 7/157 (4%)   | 1 (reference)        |         |                                                |         |
| SMC, optimal MMSE-5, imperfect VAT               | 4/52 (8%)    | 1.85 (0.54 to 6.32)  | 0.327   | 1.57 (0.46 to 5.41)                            | 0.475   |
| SMC, imperfect MMSE-5, optimal VAT               | 22/216 (10%) | 2.54 (1.09 to 5.95)  | 0.032   | 2.29 (0.97 to 5.40)                            | 0.058   |
| SMC, imperfect MMSE-5, imperfect VAT             | 51/171 (30%) | 7.77 (3.52 to 17.15) | <.001   | 6.44 (2.88 to 14.40)                           | <.001   |

\* Adjusted for age and educational level

<sup>a</sup> For 50 participants at least one of the following was missing: SMC, MMSE-5, VAT

**Supplementary table 3. Analyses for possible covariates**

|                  | n/N (%) | HR (95% CI)      | p-value |
|------------------|---------|------------------|---------|
| Age (continuous) | -       | 1.14 (1.08-1.20) | < .001  |

|                        |                  |                  |       |
|------------------------|------------------|------------------|-------|
|                        |                  |                  |       |
| Low education          | 74/822 (9%)      | 1 (reference)    |       |
| Intermediate education | 133/2140<br>(6%) | 0.68 (0.52-0.91) | 0.009 |
| High education         | 22/458 (5%)      | 0.55 (0.34-0.88) | 0.013 |
|                        |                  |                  |       |
| Male                   | 100/1569<br>(6%) | 1 (reference)    |       |
| Female                 | 133/1885<br>(7%) | 1.03 (0.79-1.33) | 0.831 |

**Supplementary table 4. Sensitivity analyses correcting for randomization group**

|        | n/N (%)          | HR (95% CI)         | p-value | Adjusted HR <sup>c</sup> (95% CI) <sup>*</sup> | p-value |
|--------|------------------|---------------------|---------|------------------------------------------------|---------|
| No SMC | 146/2822<br>(5%) | 1 (reference)       |         |                                                |         |
| SMC    | 86/601 (14%)     | 3.01 (2.31 to 3.94) | < .001  | 3.01 (2.32-3.93)                               | < .001  |

|                                   |               |                     |        |                  |        |
|-----------------------------------|---------------|---------------------|--------|------------------|--------|
| Optimal MMSE item 5 (3 points)    | 59/1403 (4%)  | 1 (reference)       |        |                  |        |
| Imperfect MMSE item 5 (<3 points) | 174/2050 (8%) | 2.14 (1.59 to 2.87) | < .001 | 2.14 (1.60-2.88) | 0.007  |
| Optimal VAT (6 points)            | 106/2454 (4%) | 1 (reference)       |        |                  |        |
| Imperfect VAT (<6 points)         | 124/982 (13%) | 3.19 (2.46 to 4.13) | < .001 | 3.19 (2.46-4.13) | < .001 |

\* Adjusted for randomization group; for easy reference the original estimates from Table 2 are shown on the left

Abbreviations: n = number of dementia cases; N = number at risk; HR = hazard ratio; CI = confidence interval; SMC = subjective memory complaints; MMSE-5 = Mini-Mental State Examination, item 5 (delayed recall); VAT = Visual Association Test

**Supplementary table 5. Sensitivity analyses using a less strict cut-off for the MMSE-5**

|                                                | n/N (%)       | HR (95% CI)         | p-value | Adjusted HR <sup>c</sup> (95% CI) <sup>*</sup> | p-value |
|------------------------------------------------|---------------|---------------------|---------|------------------------------------------------|---------|
| High MMSE-5 (2-3 points)                       | 150/2778 (5%) | 1 (reference)       |         |                                                |         |
| Low MMSE-5 (0-1 points)                        | 83/675 (12%)  | 2.47 (1.89 to 3.23) | <.001   | 2.39 (1.82 to 3.13)                            | <.001   |
| No SMC & high MMSE-5 (2-3 points) <sup>a</sup> | 102/2308 (4%) | 1 (reference)       |         |                                                |         |
| No SMC & low MMSE-5 (0-1 points)               | 44/513 (9%)   | 2.02 (1.42 to 2.88) | <.001   | 1.97 (1.37 to 2.82)                            | <.001   |

|                                |              |                      |       |                     |       |
|--------------------------------|--------------|----------------------|-------|---------------------|-------|
| SMC & high MMSE-5 (2-3 points) | 48/444 (11%) | 2.56 (1.82 to 3.62)  | <.001 | 2.56 (1.81 to 3.62) | <.001 |
| SMC & low MMSE-5 (0-1 points)  | 38/157 (24%) | 6.93 (4.77 to 10.07) | <.001 | 6.52 (4.46 to 9.54) | <.001 |

\* Adjusted for age and educational level

<sup>a</sup> For 32 participants SMC and/or MMSE-5 was missing

### Supplementary table 6. Sensitivity analyses using a less strict cut-off for the VAT

|                                             | n/N (%)       | HR (95% CI)          | p-value | Adjusted HR <sup>c</sup> (95% CI) <sup>*</sup> | p-value |
|---------------------------------------------|---------------|----------------------|---------|------------------------------------------------|---------|
| High VAT (5-6 points)                       | 156/3058 (5%) | 1 (reference)        |         |                                                |         |
| Low VAT (0-4 points)                        | 74/378 (20%)  | 4.40 (3.34 to 5.81)  | <.001   | 4.12 (3.11 to 5.45)                            | <.001   |
| No SMC & high VAT (5-6 points) <sup>a</sup> | 77/2060 (4%)  | 1 (reference)        |         |                                                |         |
| No SMC & low VAT (0-4 points)               | 68/749 (9%)   | 2.62 (1.89 to 3.63)  | <.001   | 2.56 (1.84 to 3.57)                            | <.001   |
| SMC & high VAT (5-6 points)                 | 29/373 (8%)   | 2.25 (1.47 to 3.44)  | <.001   | 2.33 (1.52 to 3.58)                            | <.001   |
| SMC & low VAT (0-4 points)                  | 55/223 (25%)  | 7.74 (5.47 to 10.94) | <.001   | 7.15 (5.01 to 10.19)                           | <.001   |

\* Adjusted for age and educational level

<sup>a</sup> For 49 participants SMC and/or VAT was missing

**Supplementary table 7. Sensitivity analysis using less strict cut-offs for MMSE-5 and the VAT in combination with SMC**

|                                            | n/N          | HR (95% CI)          | p-value | Adjusted HR <sup>c</sup> (95% CI) <sup>*</sup> | p-value |
|--------------------------------------------|--------------|----------------------|---------|------------------------------------------------|---------|
| No SMC, high MMSE-5, high VAT <sup>a</sup> | 76/2106 (4%) | 1 (reference)        |         |                                                |         |
| No SMC, high MMSE-5, low VAT               | 25/191 (13%) | 3.97 (2.53 to 6.24)  | <.001   | 3.80 (2.41 to 5.98)                            | <.001   |
| No SMC, low MMSE-5, high VAT               | 29/432 (7%)  | 1.92 (1.25 to 2.94)  | 0.003   | 1.88 (1.22 to 2.91)                            | 0.005   |
| No SMC, low MMSE-5, low VAT                | 15/79 (19%)  | 6.00 (3.45 to 10.45) | <.001   | 6.18 (3.54 to 10.78)                           | <.001   |
|                                            |              |                      |         |                                                |         |
| SMC, high MMSE-5, high VAT                 | 31/379 (8%)  | 1 (reference)        |         |                                                |         |
| SMC, high MMSE-5, low VAT                  | 16/61 (26%)  | 3.98 (2.17 to 7.31)  | <.001   | 3.21 (1.70 to 6.06)                            | <.001   |
| SMC, low MMSE-5, high VAT                  | 20/117 (17%) | 2.54 (1.44 to 4.48)  | 0.001   | 2.22 (1.25 to 3.94)                            | 0.007   |
| SMC, low MMSE-5, low VAT                   | 17/39 (44%)  | 7.30 (4.02 to 13.28) | <.001   | 6.22 (3.38 to 11.47)                           | <.001   |

\* Adjusted for age and educational level

<sup>a</sup> For 50 participants at least one of the following was missing: SMC, MMSE-5, VAT

Supplementary table 8. Analyses repeated with MMSE sum scores replacing MMSE-5 scores

|                                                    | n/N (%)       | HR (95% CI)          | p-value | Adjusted HR <sup>c</sup> (95% CI)* | p-value |
|----------------------------------------------------|---------------|----------------------|---------|------------------------------------|---------|
| MMSE Sum $\geq$ 28 <sup>a</sup>                    | 117/2489 (5%) | 1 (reference)        |         |                                    |         |
| MMSE Sum < 28                                      | 115/959 (12%) | 2.74 (2.12 to 3.55)  | <.001   | 2.64 (2.03 to 3.45)                | <.001   |
|                                                    |               |                      |         |                                    |         |
| No SMC & MMSE Sum $\geq$ 28 <sup>b</sup>           | 85/2099 (4%)  | 1 (reference)        |         |                                    |         |
| No SMC & MMSE Sum < 28                             | 61/718 (8%)   | 2.18 (1.57 to 3.03)  | <.001   | 2.10 (1.50 to 2.94)                | <.001   |
| SMC & MMSE Sum $\geq$ 28                           | 32/364 (9%)   | 2.25 (1.50 to 3.38)  | <.001   | 2.23 (1.47 to 3.37)                | <.001   |
| SMC & MMSE Sum < 28                                | 53/236 (22%)  | 6.74 (4.78 to 9.49)  | <.001   | 6.49 (4.56 to 9.23)                | <.001   |
|                                                    |               |                      |         |                                    |         |
| No SMC, optimal MMSE Sum, optimal VAT <sup>c</sup> | 50/1590 (3%)  | 1 (reference)        |         |                                    |         |
| No SMC, optimal MMSE Sum, imperfect VAT            | 35/500 (7%)   | 2.38 (1.54 to 3.66)  | <.001   | 2.32 (1.50 to 3.59)                | <.001   |
| No SMC, imperfect MMSE Sum, optimal VAT            | 27/467 (6%)   | 1.88 (1.18 to 3.00)  | 0.008   | 1.87 (1.16 to 3.02)                | 0.011   |
| No SMC, imperfect MMSE Sum, imperfect VAT          | 33/248 (13%)  | 4.77 (3.08 to 7.41)  | <.001   | 4.69 (3.00 to 7.33)                | <.001   |
|                                                    |               |                      |         |                                    |         |
| SMC, optimal MMSE Sum, optimal VAT                 | 14/252 (6%)   | 1 (reference)        |         |                                    |         |
| SMC, optimal MMSE Sum, imperfect VAT               | 17/108 (16%)  | 2.66 (1.30 to 5.45)  | 0.008   | 2.27 (1.09 to 4.73)                | 0.029   |
| SMC, imperfect MMSE Sum, optimal VAT               | 15/121 (12%)  | 2.37 (1.14 to 4.90)  | 0.021   | 2.12 (1.02 to 4.43)                | 0.045   |
| SMC, imperfect MMSE, imperfect VAT                 | 38/115 (33%)  | 7.39 (4.00 to 13.65) | <.001   | 6.18 (3.29 to 11.60)               | <.001   |

\* Adjusted for age and educational level

<sup>a</sup> For 6 participants MMSE Sum score was missing

<sup>b</sup> For 37 participants SMC and/or MMSE Sum score was missing

<sup>c</sup> For 53 participants SMC and/or MMSE Sum score and/or VAT was missing

Supplementary table 9. Sensitivity analyses using a less strict cut-off for the MMSE sum score and the VAT

|                                      | n/N (%)       | HR (95% CI)          | p-value | Adjusted HR <sup>c</sup> (95% CI)* | p-value |
|--------------------------------------|---------------|----------------------|---------|------------------------------------|---------|
| MMSE Sum >= 27                       | 153/2959 (5%) | 1 (reference)        |         |                                    |         |
| MMSE Sum < 27                        | 79/489 (16%)  | 3.41 (2.60 to 4.47)  | <.001   | 3.24 (2.44 to 4.30)                | <.001   |
| No SMC & MMSE Sum >= 27 <sup>b</sup> | 108/2459 (4%) | 1 (reference)        |         |                                    |         |
| No SMC & MMSE Sum < 27               | 38/358 (11%)  | 2.53 (1.75 to 3.66)  | <.001   | 2.42 (1.66 to 3.54)                | <.001   |
| SMC & MMSE Sum >= 27                 | 44/471 (9%)   | 2.24 (1.58 to 3.18)  | <.001   | 2.23 (1.57 to 3.19)                | <.001   |
| SMC & MMSE Sum < 27                  | 41/129 (32%)  | 9.29 (6.48 to 13.32) | <.001   | 8.76 (6.04 to 12.72)               | <.001   |



|                                              |              |                       |       |                       |       |
|----------------------------------------------|--------------|-----------------------|-------|-----------------------|-------|
| No SMC, high MMSE Sum, high VAT <sup>c</sup> | 85/2237 (4%) | 1 (reference)         |       |                       |       |
| No SMC, high MMSE Sum, low VAT               | 22/211 (10%) | 2.93 (1.84 to 4.69)   | <.001 | 2.80 (1.75 to 4.49)   | <.001 |
| No SMC, low MMSE Sum, high VAT               | 20/298 (7%)  | 1.79 (1.10 to 2.91)   | 0.019 | 1.73 (1.05 to 2.87)   | 0.033 |
| No SMC, low MMSE Sum, low VAT                | 18/59 (31%)  | 10.07 (6.05 to 16.77) | <.001 | 10.62 (6.34 to 17.80) | <.001 |
|                                              |              |                       |       |                       |       |
| SMC, high MMSE Sum, high VAT                 | 30/409 (7%)  | 1 (reference)         |       |                       |       |
| SMC, high MMSE Sum, low VAT                  | 13/58 (22%)  | 3.62 (1.88 to 6.97)   | <.001 | 2.97 (1.50 to 5.91)   | 0.002 |
| SMC, low MMSE Sum, high VAT                  | 21/87 (24%)  | 3.87 (2.20 to 6.78)   | <.001 | 3.35 (1.87 to 5.97)   | <.001 |
| SMC, low MMSE, low VAT                       | 20/42 (48%)  | 9.17 (5.17 to 16.26)  | <.001 | 7.76 (4.31 to 13.97)  | <.001 |

\* Adjusted for age and educational level

<sup>a</sup> For 6 participants MMSE Sum score was missing

<sup>b</sup> For 37 participants SMC and/or MMSE Sum score was missing

<sup>c</sup> For 53 participants SMC and/or MMSE Sum score and/or VAT was missing
